# Supplementary material for: Comparative Genomics of a Polyvalent Escherichia-Salmonella Phage fp01 and In Silico Analysis of Its Receptor Binding Protein and Conserved Enterobacteriaceae Phage Receptor
Source: MDPI journal article supplement (doi:10.3390/v15020379), 2023-01-28
Supplement: s1 [file s1]

**Table S1.** Homologous proteins to hypothetical protein HWB87\_gp108 identified after a blast search in the NCBI.

| Description                                                                                | Scientific Name                                                    | Max Score | Total Score | Query Cover | E value | Per. ident | Acc. Len | Accession                      |
|--------------------------------------------------------------------------------------------|--------------------------------------------------------------------|-----------|-------------|-------------|---------|------------|----------|--------------------------------|
| hypothetical protein HWB87_gp108<br>[ <i>Escherichia</i> phage fp01]                       | <i>Escherichia</i> phage fp01                                      | 1183      | 1183        | 100%        | 0       | 100        | 585      | <a href="#">YP_009841487.1</a> |
| receptor-binding tail protein<br>[ <i>Escherichia</i> phage vB_EcoS_AKFV33]                | <i>Escherichia</i> phage vB_EcoS_AKFV33                            | 1165      | 1165        | 100%        | 0       | 98.29      | 585      | <a href="#">YP_006382457.1</a> |
| receptor-binding protein [ <i>Escherichia</i> phage Lindwurm]                              | <i>Escherichia</i> phage Lindwurm                                  | 1165      | 1165        | 100%        | 0       | 98.29      | 585      | <a href="#">UCR81047.1</a>     |
| receptor-binding tail protein<br>[ <i>Salmonella</i> phage L6jm]                           | <i>Salmonella</i> phage L6jm                                       | 1163      | 1163        | 100%        | 0       | 98.12      | 585      | <a href="#">YP_009856550.1</a> |
| receptor-binding tail protein [ <i>Shigella</i> phage SSP1]                                | <i>Shigella</i> phage SSP1                                         | 1159      | 1159        | 100%        | 0       | 97.61      | 585      | <a href="#">YP_009794581.1</a> |
| hypothetical protein [ <i>Shigella sonnei</i> ]                                            | <i>Shigella sonnei</i>                                             | 1158      | 1158        | 100%        | 0       | 97.61      | 585      | <a href="#">EHE3968306.1</a>   |
| receptor-binding protein [ <i>Salmonella</i> phage vB_SalS_SA001]                          | <i>Salmonella</i> phage vB_SalS_SA001                              | 1156      | 1156        | 100%        | 0       | 97.09      | 585      | <a href="#">QKE54301.1</a>     |
| hypothetical protein [ <i>Salmonella enterica</i> subsp. <i>enterica</i> serovar Bareilly] | <i>Salmonella enterica</i> subsp. <i>enterica</i> serovar Bareilly | 1155      | 1155        | 100%        | 0       | 97.26      | 585      | <a href="#">EBS4928543.1</a>   |
| receptor binding protein [ <i>Escherichia</i> phage T5_ev212]                              | <i>Escherichia</i> phage T5_ev212                                  | 1155      | 1155        | 100%        | 0       | 97.26      | 585      | <a href="#">VUF55714.1</a>     |
| hypothetical protein [ <i>Escherichia</i> phage IME178]                                    | <i>Escherichia</i> phage IME178                                    | 1153      | 1153        | 100%        | 0       | 96.92      | 585      | <a href="#">QYC97283.1</a>     |
| receptor-binding protein [ <i>Salmonella</i> phage SP01]                                   | <i>Salmonella</i> phage SP01                                       | 1150      | 1150        | 100%        | 0       | 96.92      | 585      | <a href="#">YP_009792475.1</a> |
| hypothetical protein [ <i>Salmonella enterica</i> subsp. <i>enterica</i> serovar Thompson] | <i>Salmonella enterica</i> subsp. <i>enterica</i> serovar Thompson | 1150      | 1150        | 100%        | 0       | 96.75      | 585      | <a href="#">EBX4970993.1</a>   |
| receptor-binding protein [ <i>Salmonella</i> phage LVR16A]                                 | <i>Salmonella</i> phage LVR16A                                     | 1149      | 1149        | 100%        | 0       | 96.58      | 585      | <a href="#">YP_009804278.1</a> |
| putative receptor binding tail protein<br>[ <i>Escherichia</i> phage JLBYU43]              | <i>Escherichia</i> phage JLBYU43                                   | 1149      | 1149        | 100%        | 0       | 96.75      | 585      | <a href="#">UGO55636.1</a>     |
| receptor-binding tail tip protein<br>[ <i>Escherichia</i> phage IrisVonRoten]              | <i>Escherichia</i> phage IrisVonRoten                              | 1147      | 1147        | 100%        | 0       | 96.24      | 585      | <a href="#">QXV80353.1</a>     |
| superinfection exclusion protein<br>[ <i>Salmonella</i> phage 8sent1748]                   | <i>Salmonella</i> phage 8sent1748                                  | 1147      | 1147        | 100%        | 0       | 96.07      | 585      | <a href="#">QNI21575.1</a>     |
| super-infection exclusion protein<br>[ <i>Escherichia</i> phage phiLLS]                    | <i>Escherichia</i> phage phiLLS                                    | 1144      | 1144        | 100%        | 0       | 95.9       | 585      | <a href="#">YP_009790180.1</a> |
| receptor-binding tail tip protein<br>[ <i>Escherichia</i> phage DaisyDussoix]              | <i>Escherichia</i> phage DaisyDussoix                              | 1144      | 1144        | 100%        | 0       | 96.41      | 585      | <a href="#">QXV77375.1</a>     |

|                                                                                                        |                                                                      |      |      |      |   |       |     |                                |
|--------------------------------------------------------------------------------------------------------|----------------------------------------------------------------------|------|------|------|---|-------|-----|--------------------------------|
| putative receptor binding protein<br>[ <i>Escherichia</i> phage JLBYU40]                               | <i>Escherichia</i> phage<br>JLBYU40                                  | 1142 | 1142 | 100% | 0 | 95.56 | 585 | <a href="#">UGO55977.1</a>     |
| receptor-binding tail protein<br>[ <i>Salmonella</i> virus VSe12]                                      | <i>Salmonella</i> virus VSe12                                        | 1140 | 1140 | 100% | 0 | 95.38 | 585 | <a href="#">YP_009849685.1</a> |
| receptor-binding tail protein<br>[ <i>Escherichia</i> virus VEc33]                                     | <i>Escherichia</i> virus VEc33                                       | 1139 | 1139 | 100% | 0 | 95.21 | 585 | <a href="#">YP_009853082.1</a> |
| receptor-binding tail protein<br>[ <i>Escherichia</i> phage<br>vB_Eco_mar004NP2]                       | <i>Escherichia</i> phage<br>vB_Eco_mar004NP2                         | 1138 | 1138 | 100% | 0 | 95.21 | 585 | <a href="#">YP_009824651.1</a> |
| hypothetical protein HWD11_gp078<br>[Phage NBEco002]                                                   | Phage NBEco002                                                       | 1138 | 1138 | 100% | 0 | 95.38 | 585 | <a href="#">YP_009856968.1</a> |
| receptor-binding protein [ <i>Escherichia</i><br>phage chee24]                                         | <i>Escherichia</i> phage chee24                                      | 1137 | 1137 | 100% | 0 | 95.04 | 585 | <a href="#">YP_009795148.1</a> |
| receptor binding protein [ <i>Escherichia</i><br>phage T5_ev219]                                       | <i>Escherichia</i> phage<br>T5_ev219                                 | 1135 | 1135 | 100% | 0 | 95.04 | 585 | <a href="#">VUF55778.1</a>     |
| receptor-binding tail protein<br>[ <i>Escherichia</i> phage phiAPCEc03]                                | <i>Escherichia</i> phage<br>phiAPCEc03                               | 1135 | 1135 | 100% | 0 | 95.04 | 585 | <a href="#">YP_009785263.1</a> |
| receptor-binding protein [ <i>Shigella</i><br>phage SHSML-45]                                          | <i>Shigella</i> phage SHSML-45                                       | 1131 | 1131 | 100% | 0 | 94.53 | 585 | <a href="#">YP_009280207.1</a> |
| receptor-binding protein [ <i>Salmonella</i><br>phage GEC_vB_N3]                                       | <i>Salmonella</i> phage<br>GEC_vB_N3                                 | 1131 | 1131 | 100% | 0 | 94.7  | 585 | <a href="#">QPI15010.1</a>     |
| hypothetical protein [ <i>Salmonella</i><br><i>enterica</i> subsp. <i>enterica</i> serovar<br>Virchow] | <i>Salmonella enterica</i> subsp.<br><i>enterica</i> serovar Virchow | 1079 | 1079 | 94%  | 0 | 95.65 | 553 | <a href="#">EBS3195687.1</a>   |
| hypothetical protein VAH1_00171<br>[ <i>Escherichia</i> phage vB_EcoS_VAH1]                            | <i>Escherichia</i> phage<br>vB_EcoS_VAH1                             | 984  | 984  | 86%  | 0 | 95.24 | 509 | <a href="#">QBO80778.1</a>     |
| receptor binding protein [ <i>Escherichia</i><br>virus DT57C]                                          | <i>Escherichia</i> virus DT57C                                       | 903  | 903  | 100% | 0 | 73.04 | 586 | <a href="#">YP_009149909.1</a> |
| receptor binding protein [ <i>Salmonella</i><br>phage vB_StyS-LmqSP1]                                  | <i>Salmonella</i> phage<br>vB_StyS-LmqSP1                            | 901  | 901  | 100% | 0 | 72.87 | 586 | <a href="#">QQM13691.1</a>     |
| hypothetical protein HASG4_00180<br>[ <i>Escherichia</i> phage vB_EcoS_HASG4]                          | <i>Escherichia</i> phage<br>vB_EcoS_HASG4                            | 900  | 900  | 100% | 0 | 73.21 | 586 | <a href="#">QBO81433.1</a>     |
| receptor recognition protein<br>[ <i>Enterobacteria</i> phage D1G]                                     | <i>Enterobacteria</i> phage D1G                                      | 888  | 888  | 98%  | 0 | 72.54 | 580 | <a href="#">ACN72594.1</a>     |
| receptor-binding protein [ <i>Salmonella</i><br>phage vB_SalS_ABTNLsp4]                                | <i>Salmonella</i> phage<br>vB_SalS_ABTNLsp4                          | 870  | 870  | 100% | 0 | 72.99 | 595 | <a href="#">QPI13164.1</a>     |
| receptor-binding protein [ <i>Salmonella</i><br>phage vB_SenS_S124]                                    | <i>Salmonella</i> phage<br>vB_SenS_S124                              | 866  | 866  | 100% | 0 | 72.65 | 595 | <a href="#">UDL14130.1</a>     |
| receptor-binding protein [ <i>Salmonella</i><br>virus SPC35]                                           | <i>Salmonella</i> virus SPC35                                        | 863  | 863  | 100% | 0 | 72.65 | 595 | <a href="#">YP_004306626.1</a> |
| hypothetical protein [ <i>Salmonella</i> phage<br>vB_SalS_ABTNLsp9]                                    | <i>Salmonella</i> phage<br>vB_SalS_ABTNLsp9                          | 863  | 863  | 100% | 0 | 72.82 | 595 | <a href="#">QPI13621.1</a>     |
| hypothetical protein [ <i>Salmonella</i><br><i>enterica</i> subsp. <i>enterica</i> ]                   | <i>Salmonella enterica</i> subsp.<br><i>enterica</i>                 | 862  | 862  | 100% | 0 | 72.65 | 595 | <a href="#">EDT3055638.1</a>   |

|                                                                                         |                                                                 |     |     |      |   |       |     |                                |
|-----------------------------------------------------------------------------------------|-----------------------------------------------------------------|-----|-----|------|---|-------|-----|--------------------------------|
| receptor-binding protein [ <i>Salmonella</i> phage Th1]                                 | <i>Salmonella</i> phage Th1                                     | 862 | 862 | 100% | 0 | 72.48 | 595 | <a href="#">YP_009849830.1</a> |
| hypothetical protein HWC04_gp081 [ <i>Escherichia</i> phage vB_EcoS_HdH2]               | <i>Escherichia</i> phage vB_EcoS_HdH2                           | 860 | 860 | 100% | 0 | 72.48 | 595 | <a href="#">YP_009843474.1</a> |
| receptor-binding protein [ <i>Salmonella</i> phage vB_Sen-E22]                          | <i>Salmonella</i> phage vB_Sen-E22                              | 860 | 860 | 100% | 0 | 72.82 | 595 | <a href="#">QJD49399.1</a>     |
| hypothetical protein HWD12_gp022 [Phage NBSal003]                                       | Phage NBSal003                                                  | 859 | 859 | 100% | 0 | 72.65 | 595 | <a href="#">YP_009857011.1</a> |
| receptor binding protein [ <i>Salmonella</i> phage NR01]                                | <i>Salmonella</i> phage NR01                                    | 858 | 858 | 100% | 0 | 72.32 | 595 | <a href="#">YP_009283429.1</a> |
| receptor-binding protein [ <i>Escherichia</i> phage OSYSP]                              | <i>Escherichia</i> phage OSYSP                                  | 853 | 853 | 100% | 0 | 72.32 | 595 | <a href="#">YP_009791022.1</a> |
| hypothetical protein [ <i>Salmonella enterica</i> subsp. <i>enterica</i> serovar Derby] | <i>Salmonella enterica</i> subsp. <i>enterica</i> serovar Derby | 853 | 853 | 100% | 0 | 71.14 | 595 | <a href="#">ECJ4201731.1</a>   |
| hypothetical protein [ <i>Salmonella</i> phage vB_SenS_SB10]                            | <i>Salmonella</i> phage vB_SenS_SB10                            | 839 | 839 | 100% | 0 | 69.75 | 593 | <a href="#">QFG07534.1</a>     |
| receptor-binding tail protein [ <i>Salmonella</i> phage fuchur]                         | <i>Salmonella</i> phage fuchur                                  | 838 | 838 | 100% | 0 | 69.75 | 593 | <a href="#">YP_009858397.1</a> |
| receptor-binding protein [ <i>Salmonella</i> phage S116]                                | <i>Salmonella</i> phage S116                                    | 838 | 838 | 100% | 0 | 69.58 | 593 | <a href="#">YP_009805278.1</a> |
| receptor binding protein [ <i>Salmonella</i> phage BSP22A]                              | <i>Salmonella</i> phage BSP22A                                  | 837 | 837 | 100% | 0 | 69.41 | 593 | <a href="#">ARM69832.1</a>     |
| receptor-binding protein [ <i>Salmonella</i> phage 1-23]                                | <i>Salmonella</i> phage 1-23                                    | 835 | 835 | 100% | 0 | 69.58 | 593 | <a href="#">YP_009819432.1</a> |
| receptor-binding tail protein [ <i>Salmonella</i> phage bux]                            | <i>Salmonella</i> phage bux                                     | 835 | 835 | 100% | 0 | 69.41 | 593 | <a href="#">QIQ61537.1</a>     |
| receptor-binding protein [ <i>Salmonella</i> phage SE24]                                | <i>Salmonella</i> phage SE24                                    | 835 | 835 | 100% | 0 | 69.75 | 593 | <a href="#">YP_009848613.1</a> |
| receptor-binding tail protein [ <i>Salmonella</i> phage ende]                           | <i>Salmonella</i> phage ende                                    | 834 | 834 | 100% | 0 | 69.37 | 590 | <a href="#">QIN99960.1</a>     |
| receptor binding protein [Phage vB_SabS_Sds2]                                           | Phage vB_SabS_Sds2                                              | 833 | 833 | 100% | 0 | 69.41 | 593 | <a href="#">QRV67772.1</a>     |
| receptor-binding tail protein [ <i>Salmonella</i> phage vaffelhjerte]                   | <i>Salmonella</i> phage vaffelhjerte                            | 833 | 833 | 100% | 0 | 69.58 | 593 | <a href="#">QIN99637.1</a>     |
| receptor-binding tail tip protein [ <i>Escherichia</i> phage TrudiGerster]              | <i>Escherichia</i> phage TrudiGerster                           | 833 | 833 | 100% | 0 | 69.37 | 590 | <a href="#">QXV85240.1</a>     |
| hypothetical protein [ <i>Salmonella enterica</i> ]                                     | <i>Salmonella enterica</i>                                      | 832 | 832 | 100% | 0 | 69.24 | 593 | <a href="#">ECJ3451677.1</a>   |
| receptor-binding tail tip protein [ <i>Escherichia</i> phage TrudiRoth]                 | <i>Escherichia</i> phage TrudiRoth                              | 832 | 832 | 100% | 0 | 69.41 | 593 | <a href="#">QXV85422.1</a>     |
| receptor-binding tail protein [ <i>Salmonella</i> phage faergetype]                     | <i>Salmonella</i> phage faergetype                              | 832 | 832 | 100% | 0 | 69.24 | 593 | <a href="#">YP_009858071.1</a> |

|                                                                                               |                                                                       |     |     |      |   |       |     |                                |
|-----------------------------------------------------------------------------------------------|-----------------------------------------------------------------------|-----|-----|------|---|-------|-----|--------------------------------|
| receptor-binding protein [ <i>Escherichia</i> phage vB EcoS-261751]                           | <i>Escherichia</i> phage vB EcoS-261751                               | 832 | 832 | 100% | 0 | 69.04 | 590 | <a href="#">QDJ99943.1</a>     |
| receptor binding protein [ <i>Salmonella</i> phage S147]                                      | <i>Salmonella</i> phage S147                                          | 831 | 831 | 100% | 0 | 69.24 | 593 | <a href="#">YP_009806052.1</a> |
| hypothetical protein HWC64_gp078 [ <i>Salmonella</i> phage OSY-STA]                           | <i>Salmonella</i> phage OSY-STA                                       | 831 | 831 | 100% | 0 | 69.24 | 593 | <a href="#">YP_009851883.1</a> |
| receptor-binding protein [ <i>Escherichia</i> phage saus132]                                  | <i>Escherichia</i> phage saus132                                      | 831 | 831 | 100% | 0 | 69.58 | 593 | <a href="#">YP_009794986.1</a> |
| receptor-binding tail protein [ <i>Salmonella</i> phage rokbitter]                            | <i>Salmonella</i> phage rokbitter                                     | 830 | 830 | 100% | 0 | 69.24 | 593 | <a href="#">YP_009858234.1</a> |
| receptor-binding tail protein [ <i>Salmonella</i> phage smaug]                                | <i>Salmonella</i> phage smaug                                         | 829 | 829 | 100% | 0 | 68.87 | 590 | <a href="#">QIO00945.1</a>     |
| receptor-binding protein [ <i>Salmonella</i> phage vB SenS SB9]                               | <i>Salmonella</i> phage vB SenS SB9                                   | 829 | 829 | 100% | 0 | 69.41 | 593 | <a href="#">QDH47394.1</a>     |
| receptor-binding tail protein [ <i>Salmonella</i> phage bombadil]                             | <i>Salmonella</i> phage bombadil                                      | 828 | 828 | 100% | 0 | 69.41 | 593 | <a href="#">YP_009857907.1</a> |
| receptor-binding tail protein [ <i>Salmonella</i> phage Seabear]                              | <i>Salmonella</i> phage Seabear                                       | 828 | 828 | 100% | 0 | 69.08 | 593 | <a href="#">QCO65488.1</a>     |
| hypothetical protein HOT53_gp024 [ <i>Salmonella</i> phage SH9]                               | <i>Salmonella</i> phage SH9                                           | 828 | 828 | 100% | 0 | 69.08 | 593 | <a href="#">YP_009804131.1</a> |
| receptor-binding protein [ <i>Salmonella</i> virus Stitch]                                    | <i>Salmonella</i> virus Stitch                                        | 828 | 828 | 100% | 0 | 69.08 | 593 | <a href="#">YP_009146101.1</a> |
| receptor-binding protein [ <i>Salmonella</i> phage Seafire]                                   | <i>Salmonella</i> phage Seafire                                       | 828 | 828 | 100% | 0 | 69.41 | 593 | <a href="#">YP_009816816.1</a> |
| receptor-binding protein [ <i>Salmonella</i> phage 2-3]                                       | <i>Salmonella</i> phage 2-3                                           | 828 | 828 | 100% | 0 | 69.24 | 593 | <a href="#">YP_009852070.1</a> |
| receptor-binding tail tip protein [ <i>Escherichia</i> phage SelmaRatti]                      | <i>Escherichia</i> phage SelmaRatti                                   | 828 | 828 | 100% | 0 | 69.97 | 595 | <a href="#">QXV84460.1</a>     |
| FhuA receptor-binding tail protein [ <i>Salmonella</i> phage Sepoy]                           | <i>Salmonella</i> phage Sepoy                                         | 828 | 828 | 100% | 0 | 69.08 | 593 | <a href="#">YP_009845375.1</a> |
| receptor-blocking protein [ <i>Salmonella</i> phage SE3]                                      | <i>Salmonella</i> phage SE3                                           | 827 | 827 | 100% | 0 | 69.24 | 593 | <a href="#">QEG07468.1</a>     |
| receptor-binding tail protein [ <i>Salmonella</i> phage rutana]                               | <i>Salmonella</i> phage rutana                                        | 827 | 827 | 100% | 0 | 69.08 | 593 | <a href="#">QIO02001.1</a>     |
| receptor-binding tail protein [ <i>Salmonella</i> phage vB SenS-3]                            | <i>Salmonella</i> phage vB SenS-3                                     | 827 | 827 | 100% | 0 | 68.87 | 590 | <a href="#">QIN93530.1</a>     |
| hypothetical protein [ <i>Salmonella</i> phage 8sent65]                                       | <i>Salmonella</i> phage 8sent65                                       | 827 | 827 | 100% | 0 | 69.24 | 593 | <a href="#">QNI21950.1</a>     |
| receptor-binding tail protein [ <i>Salmonella</i> phage polluks]                              | <i>Salmonella</i> phage polluks                                       | 827 | 827 | 100% | 0 | 68.87 | 590 | <a href="#">QIO00289.1</a>     |
| hypothetical protein [ <i>Salmonella enterica</i> subsp. <i>enterica</i> serovar Typhimurium] | <i>Salmonella enterica</i> subsp. <i>enterica</i> serovar Typhimurium | 827 | 827 | 100% | 0 | 68.91 | 593 | <a href="#">EDV2866874.1</a>   |

|                                                                                         |                                                                 |     |     |      |   |       |     |                                |
|-----------------------------------------------------------------------------------------|-----------------------------------------------------------------|-----|-----|------|---|-------|-----|--------------------------------|
| receptor-binding protein [ <i>Escherichia</i> phage vB Eco mar003J3]                    | <i>Escherichia</i> phage vB Eco mar003J3                        | 826 | 826 | 100% | 0 | 69.24 | 593 | <a href="#">YP_009824387.1</a> |
| hypothetical protein [ <i>Salmonella enterica</i> subsp. <i>enterica</i> ]              | <i>Salmonella enterica</i> subsp. <i>enterica</i>               | 822 | 822 | 100% | 0 | 69.58 | 593 | <a href="#">EDY0344208.1</a>   |
| hypothetical protein HWC37_gp093 [ <i>Salmonella</i> phage vB SenS SB13]                | <i>Salmonella</i> phage vB SenS SB13                            | 821 | 821 | 100% | 0 | 69.58 | 593 | <a href="#">YP_009848214.1</a> |
| receptor-binding protein [ <i>Salmonella</i> phage STG2]                                | <i>Salmonella</i> phage STG2                                    | 820 | 820 | 100% | 0 | 69.41 | 593 | <a href="#">YP_009815133.1</a> |
| receptor-binding protein [ <i>Salmonella</i> phage JNwz02]                              | <i>Salmonella</i> phage JNwz02                                  | 820 | 820 | 100% | 0 | 69.58 | 593 | <a href="#">QYC50589.1</a>     |
| receptor-binding tail tip protein [ <i>Escherichia</i> phage SuperGirl]                 | <i>Escherichia</i> phage SuperGirl                              | 820 | 820 | 100% | 0 | 69.41 | 593 | <a href="#">QXV84736.1</a>     |
| receptor-binding tail tip protein [ <i>Escherichia</i> phage HildyBeyeler]              | <i>Escherichia</i> phage HildyBeyeler                           | 820 | 820 | 100% | 0 | 67.95 | 595 | <a href="#">QXV80181.1</a>     |
| receptor-binding tail protein [ <i>Salmonella</i> phage falkor]                         | <i>Salmonella</i> phage falkor                                  | 818 | 818 | 100% | 0 | 69.24 | 593 | <a href="#">QIO01834.1</a>     |
| receptor-binding tail protein [ <i>Salmonella</i> phage STWB21]                         | <i>Salmonella</i> phage STWB21                                  | 815 | 815 | 100% | 0 | 68.18 | 593 | <a href="#">QTJ63420.1</a>     |
| receptor-binding tail protein [ <i>Salmonella</i> phage Sw2]                            | <i>Salmonella</i> phage Sw2                                     | 805 | 805 | 100% | 0 | 68.01 | 593 | <a href="#">YP_009812307.1</a> |
| receptor-binding protein [ <i>Escherichia coli</i> phage vB EcoS Ace]                   | <i>Escherichia coli</i> phage vB EcoS Ace                       | 803 | 803 | 100% | 0 | 67.85 | 593 | <a href="#">QNR52195.1</a>     |
| receptor-binding tail protein [ <i>Salmonella</i> phage bastian]                        | <i>Salmonella</i> phage bastian                                 | 802 | 802 | 100% | 0 | 67.56 | 593 | <a href="#">YP_009858562.1</a> |
| receptor binding protein [ <i>Salmonella</i> phage 1-19]                                | <i>Salmonella</i> phage 1-19                                    | 800 | 800 | 100% | 0 | 67.9  | 593 | <a href="#">YP_009853229.1</a> |
| receptor-binding tail protein [ <i>Salmonella</i> phage gmork]                          | <i>Salmonella</i> phage gmork                                   | 800 | 800 | 100% | 0 | 68.24 | 593 | <a href="#">QIO01163.1</a>     |
| hypothetical protein [ <i>Salmonella enterica</i> subsp. <i>enterica</i> serovar Hadar] | <i>Salmonella enterica</i> subsp. <i>enterica</i> serovar Hadar | 798 | 798 | 100% | 0 | 68.4  | 593 | <a href="#">EDV1300518.1</a>   |
| receptor binding protein [ <i>Salmonella</i> phage S132]                                | <i>Salmonella</i> phage S132                                    | 796 | 796 | 100% | 0 | 67.73 | 593 | <a href="#">YP_009805728.1</a> |
| receptor-binding protein [ <i>Salmonella</i> phage 100268 sal2]                         | <i>Salmonella</i> phage 100268 sal2                             | 795 | 795 | 100% | 0 | 67.73 | 593 | <a href="#">YP_009320892.1</a> |
| receptor-binding tail protein [ <i>Salmonella</i> phage bobsandoy]                      | <i>Salmonella</i> phage bobsandoy                               | 795 | 795 | 100% | 0 | 67.73 | 593 | <a href="#">QIO01330.1</a>     |
| receptor-blocking protein [ <i>Salmonella</i> phage SP3]                                | <i>Salmonella</i> phage SP3                                     | 795 | 795 | 100% | 0 | 66.44 | 595 | <a href="#">YP_009804586.1</a> |
